# Supplementary material for: Botulinum Toxin-A Injection in Chronic Pelvic Pain Syndrome Treatment: A Systematic Review and Pooled Meta-Analysis
Source: MDPI journal article supplement (doi:10.3390/toxins14010025), 2022-01-01
Supplement: s1 [file s1]

# Botulinum Toxin-A Injection in Chronic Pelvic Pain Syndrome Treatment: A Systematic Review and Pooled Meta-Analysis

Andrea Panunzio, Alessandro Tafuri, Giovanni Mazzucato, Clara Cerrato, Rossella Orlando, Vincenzo Pagliarulo, Alessandro Antonelli and Maria Angela Cerruto

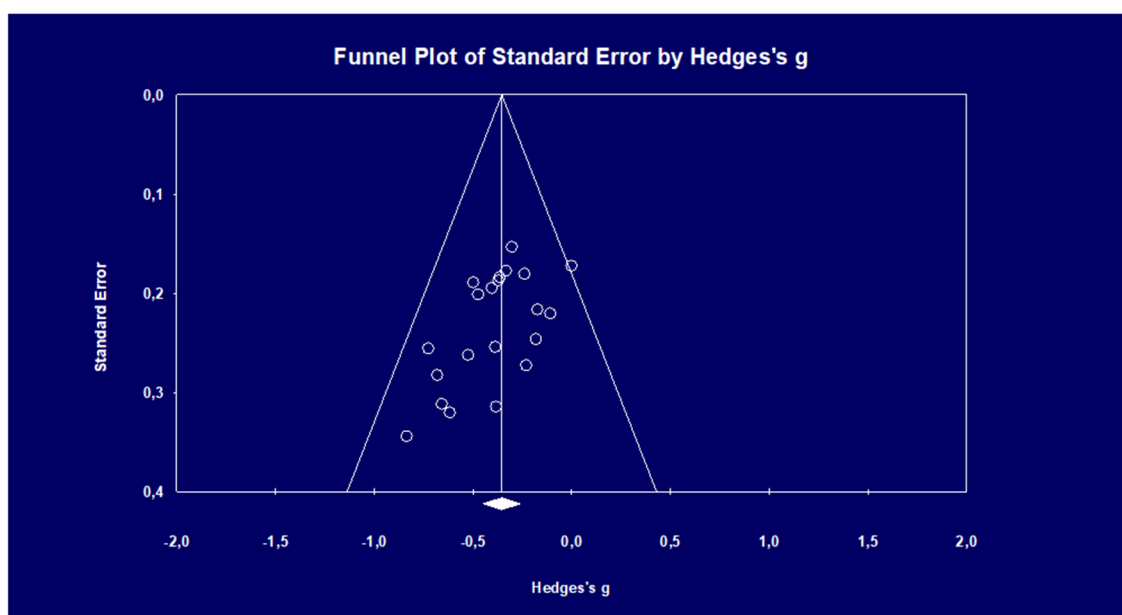

**Figure S1.** Funnel plot using standard error by Hedges'g of the pooled meta-analysis of 21 selected cohorts coming from 14 included overall studies.
